# Supplementary material
Source: publisher figshare collection journal article supplement (https://gsajournals.figshare.com/articles/dataset/_/12732311)
Supplement: Supplementary file 2 [file 1]

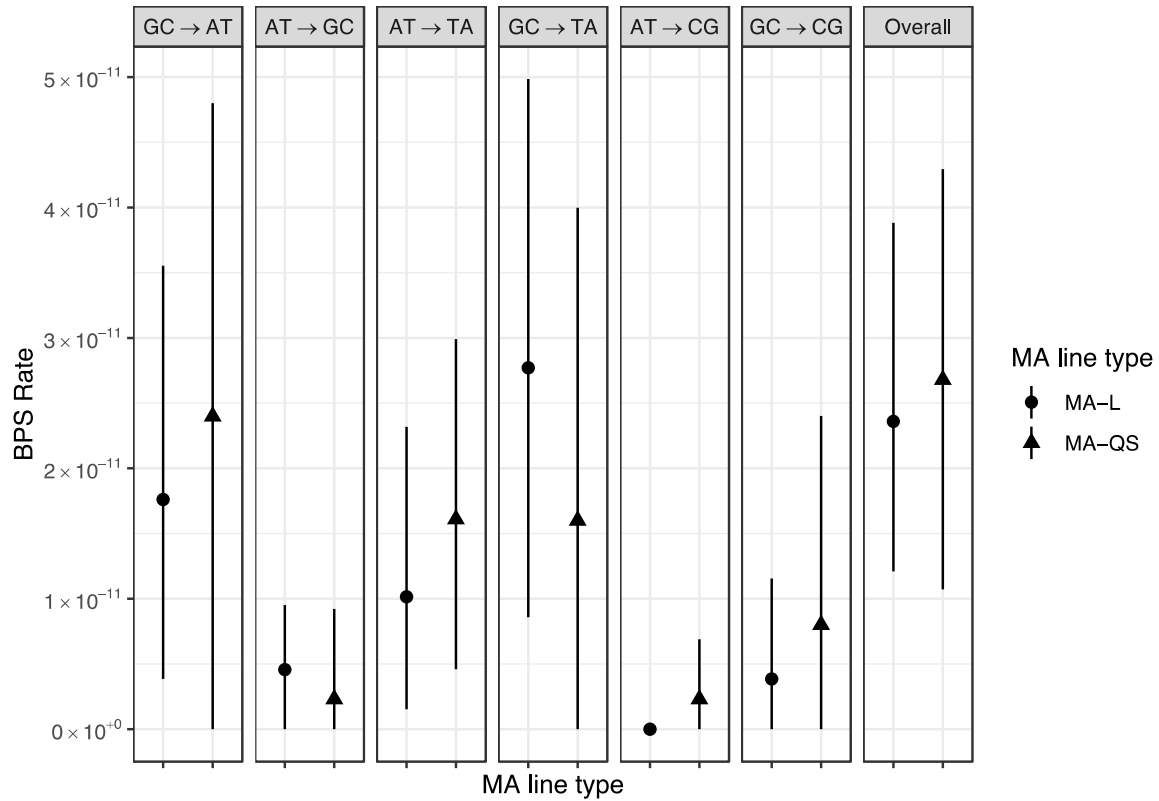

**Supplemental Figure 1. Spectrum of base-pair substitution rates observed for *D. discoideum* MA lines.** Abbreviations correspond to the following: MA-QS denotes MA lines maintained in the Queller-Strassmann Lab, MA-L lines maintained in the Lynch Lab. Circles (MA-L) and triangles (MA-QS) represent mean base-pair substitution (BPS) rates for each BPS type normalized by the nucleotide base composition of the *D. discoideum* genome; bars indicate 95% confidence intervals of the mean.
