# Supplementary material
Source: publisher figshare collection journal article supplement (https://gsajournals.figshare.com/articles/dataset/_/12732311)
Supplement: Supplementary file 3 [file 2]

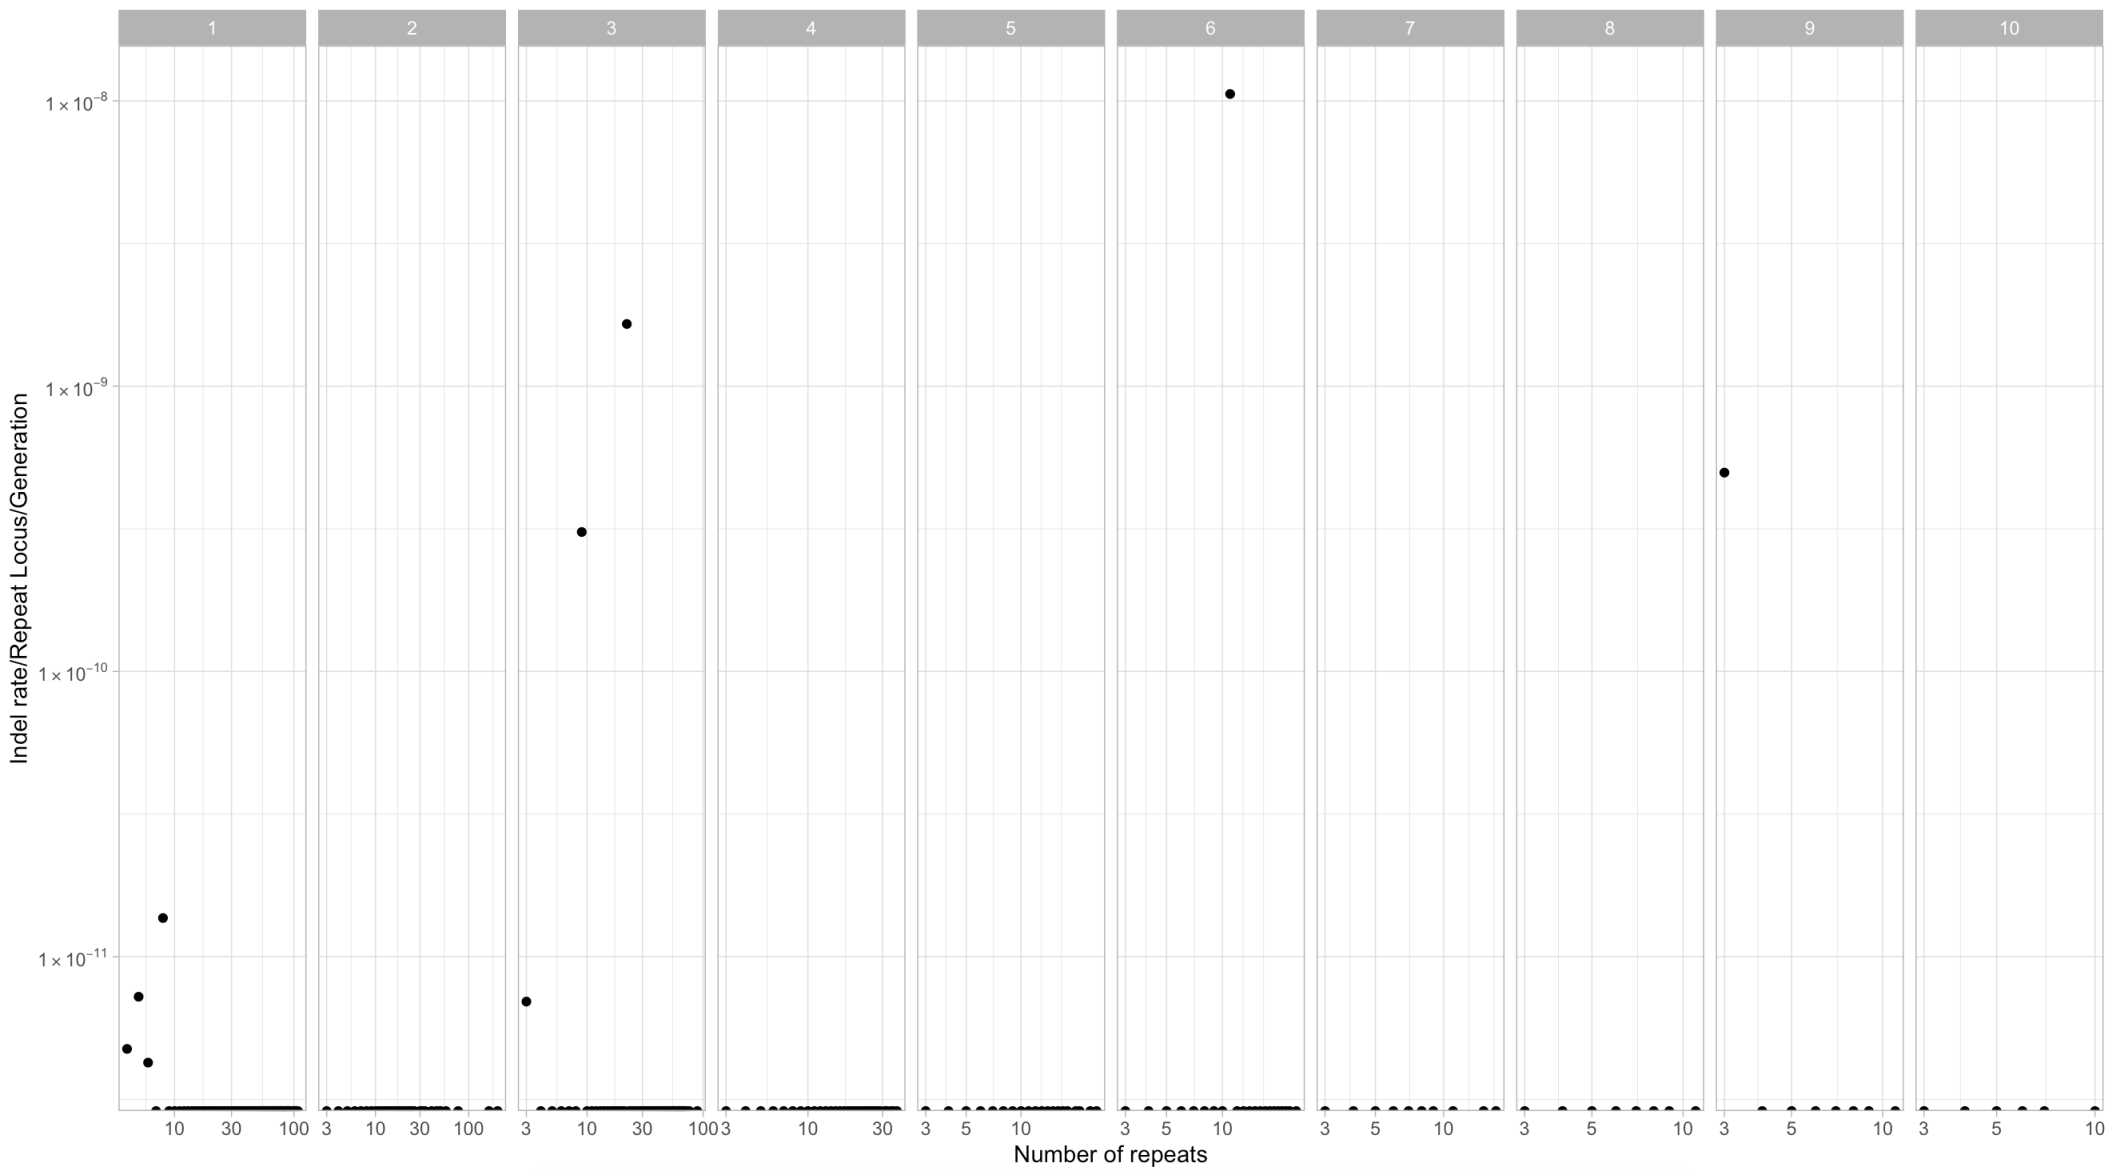

**Supplemental Figure 2. The relationship between the insertion-deletion (indel) rate (per repeat locus per generation) and the number of repeats (the number of repeats in a tandem array).** The numbers on the top of the figure show the number of nucleotide/s in the microsatellite pattern. And, indel rates are normalized by dividing by the number of target sequences (number of the array of a specific repeat motif).
